# Supplementary material for: Epidermal growth factor receptor signaling suppresses αvβ6 integrin and promotes periodontal inflammation and bone loss
Source: Oxford University Press journal article supplement (doi:10.1242/jcs.236588), 2019-11-13
Supplement: jcs236588supp.pdf [file jcs236588supp.pdf]

## Supplementary Data

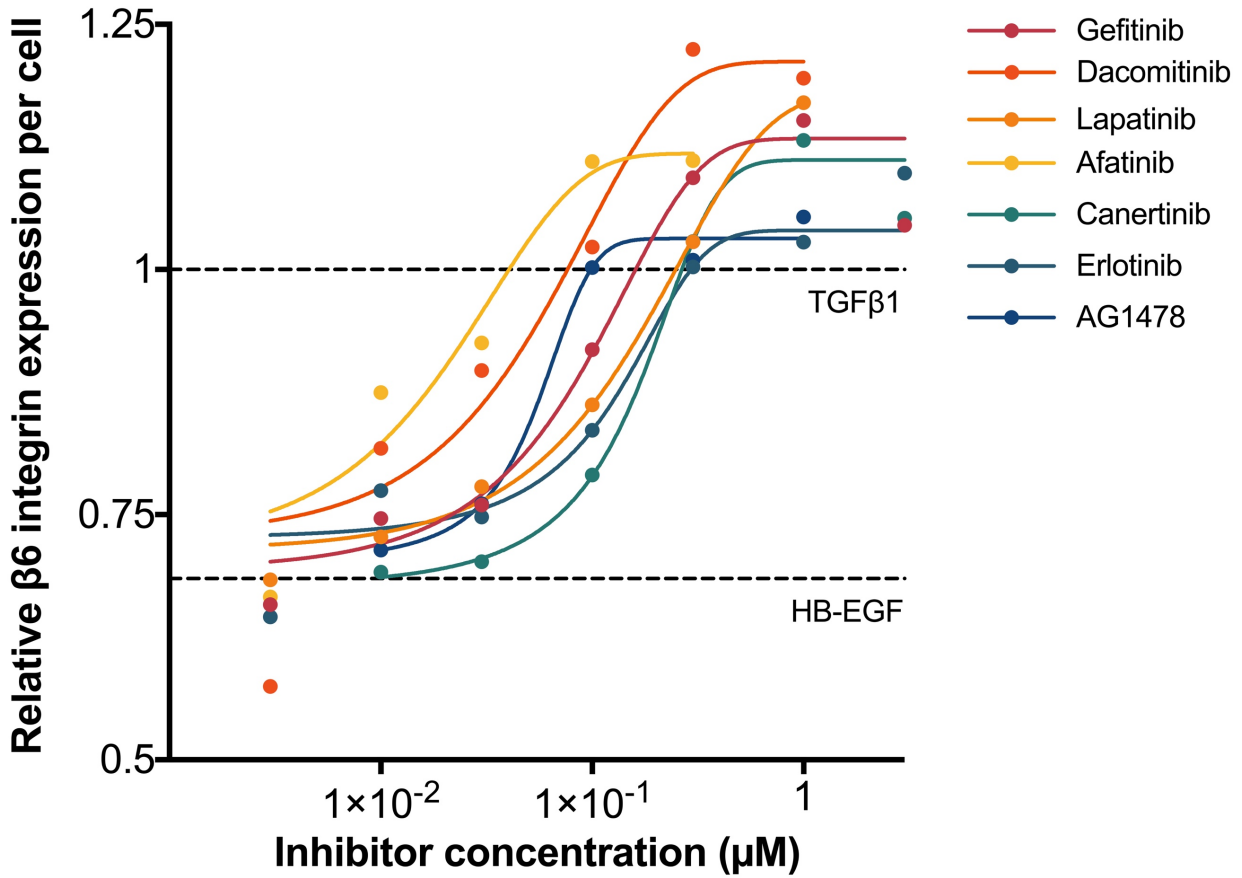

**Figure S1. EGFR inhibitors block HB-EGF-induced  $\beta 6$  integrin downregulation in GECs.** GECs were first treated with TGF- $\beta 1$  for 24 h and then with HB-EGF in the presence or absence of different concentrations (0.003–3  $\mu\text{M}$ ) of EGFR inhibitors tyrphostin AG1478, gefitinib, afatinib, erlotinib, lapatinib, dacomitinib or canertinib for 48 h. Integrin  $\beta 6$  expression relative to total cell numbers were assessed by In Cell Western blotting. Means of 3-6 experiments are presented.

**Table S1**

Primer list

| Gene         | GenBank accession number | Sequence                   |
|--------------|--------------------------|----------------------------|
| <i>ALG9</i>  | BC009255                 | GAATGACCAGAATCTAGAAGAGCCA  |
|              |                          | TTCATGGTGTCCAAATCCACTAAA   |
| <i>AREG</i>  | NM_001657                | TGGATCATAAGACAATGGACC      |
|              |                          | GCACCTTTATATACAGAAATAGCA   |
| <i>B2M</i>   | NM_004048                | TGTCTTTCAGCAAGGACTGGTCTTTC |
|              |                          | ATGGTTCACACGGCAGGCATA      |
| <i>ERG</i>   | NM_001432                | CCTGTGTTAAACACTACACATTTG   |
|              |                          | CTGGTAGATGAGTGACTAGTACC    |
| <i>GAPDH</i> | NM_002046                | CTTGTCAAGCTCATTTCTGGTA     |
|              |                          | GGCCATGAGGTCCACCA          |
| <i>HBEGF</i> | NM_001945                | GTACCATAGGAGAGGAGGTTATG    |
|              |                          | TCACCTTGTGTCTTCTCAGAG      |
| <i>IL1B</i>  | NM_000576                | CAGTCAAATGATGGCTTATT       |
|              |                          | CTTCATGTTTAGGGCCA          |
| <i>ITGB6</i> | NM_000888                | AATTGCCAACCCCTTGCAGTAG     |
|              |                          | AATGTGCTTGAATCCAAATGTAG    |
| <i>TGFA</i>  | NM_003236                | CCTGGTGGTGGTCTCCATC        |
|              |                          | AGTGTTTTCGGACCTGGCA        |

**Table S2**

The RT-qPCR Cq values of EGFR ligands in GECs prior to their treatment with biofilm or FSL- 1 (mean  $\pm$  s.e.m.), n = 3-9.

|         | Amphiregulin     | Epiregulin       | HB-EGF           | TGF $\alpha$     |
|---------|------------------|------------------|------------------|------------------|
| Control | 28.10 $\pm$ 0.31 | 30.14 $\pm$ 0.87 | 25.83 $\pm$ 0.43 | 25.48 $\pm$ 0.35 |
| Biofilm | 25.86 $\pm$ 0.39 | 28.07 $\pm$ 0.92 | 22.97 $\pm$ 0.24 | 24.88 $\pm$ 0.26 |
| FSL-1   | 26.60 $\pm$ 0.23 | 29.13 $\pm$ 1.18 | 22.91 $\pm$ 0.31 | 24.80 $\pm$ 0.21 |
